# Supplementary material
Source: publisher site journal article supplement (https://www.spandidos-publications.com/8674/downloadSupplementary)
Supplement: Supplementary file [file downloadSupplementary]

Table SI. Oligonucleotide used for small interfering RNA.

| Oligo name        | Sense                   | Antisense               |
|-------------------|-------------------------|-------------------------|
| <i>FLII</i> -1142 | CCCUUCUGACAUCUCCUACAUTT | AUGUAGGAGAUGUCAGAAGGGTT |
| <i>FLII</i> -294  | CCCAUGAACUACAACAGCUAUTT | AUAGCUGUUGUAGUUCAUGGGTT |
| <i>ISG15</i> -142 | CAUGUCGGUGUCAGAGCUGAATT | UUCAGCUCUGACACCGACAUGTT |
| <i>ISG15</i> -320 | CUGAGCAUCCUGGUGAGGAAUTT | AUCCUCACCAGGAUGCUCAGTT  |
| Negative control  | UUCUCCGAACGUGUCACGUTT   | ACGUGACACGUUCGGAGAATT   |

Table SII. Oligonucleotide used for short hairpin RNA.

| Oligo name              | Targeting of the sequence |
|-------------------------|---------------------------|
| <i>FLL1-1</i>           | CCCATGAACTACAACAGCTAT     |
| <i>FLL1-2</i>           | CCCTTCTGACATCTCCTACAT     |
| <i>ISG15-1</i>          | CATGTCGGTGTGTCAGAGCTGAA   |
| <i>ISG15-2</i>          | CTGAGCATCCTGGTGAGGAAT     |
| <i>Negative control</i> | TTCTCCGAACGTGTCACGT       |

Table SIII. Oligonucleotide primers used for reverse transcription-PCR.

| ID             | Oligo name | Oligo sequence             | Product size |
|----------------|------------|----------------------------|--------------|
| <i>FLL1</i>    | SJ205      | AGGGGCACAAACGATCAGTA       | 124bp        |
|                | SJ206      | GAATTGCCACAGCTGGATCT       |              |
| <i>ISG15</i>   | SJ4002     | CTCTGAGCATCCTGGTGAGGAA     | 136bp        |
|                | SJ4003     | AAGGTCAGCCAGAACAGGTCGT     |              |
| <i>FECR1</i>   | SJ3827     | CTGTTGTCACACCTCAGTTAC      | 198bp        |
|                | SJ3829     | CTGGCTGATTGATCCACTCCTGC    |              |
| $\beta$ -actin | J880       | CAGGTCATCACCATTGGCAATGAGC  | 135bp        |
|                | J881       | CGGATGTCCACGTCACACTTCATGA  |              |
| U2             | JH1055     | ATCTGTTCTTATCAGTTTAATATCTG | 151bp        |
|                | JH1056     | GGGTGCACCGTTCCTGGAGGTAC    |              |

Table SIV. Oligonucleotide primers used for *FECR1 CRIST assay*.

| Oligo name | Oligo sequence                      | Product size(bp) |
|------------|-------------------------------------|------------------|
| 5'-Ctl     | JH2521 GCATAATCTTATTTGTCCTCCAATAACC | 124              |
|            | JH2522 GCAGAAAAGTTCTCCCACAAGC       |                  |
| P1         | JH4053 CTCGGTTTTCGTCCGAGTCTTC       | 119              |
|            | JH4054 TTTTCCAGCCGGAGACAAACT        |                  |
| P2         | JH2756 GGGCTGCGAGGTCAGGCT           | 106              |
|            | JH4528 GTTGCCCCGCCGCTTACCTTA        |                  |
| E1         | JH2528 AGGGAGCTATAAGAGCCTAT         | 163              |
|            | JH2529 GAGACACTTGCATGAACACATC       |                  |

Table SV. Oligonucleotide primers used for *ChIP*.

| <i>A, ISG15 CHIP</i> |            |                             |                   |
|----------------------|------------|-----------------------------|-------------------|
| Group                | Oligo name | Oligo sequence              | Product size (bp) |
| A                    | SJ4150     | ACACCAATCTGAGCAAATACTG      | 158               |
|                      | SJ4151     | GCTGTCATCACATGGACTAATG      |                   |
| B                    | SJ4152     | TTATAATAGGGCCGGTGCTGCC      | 119               |
|                      | SJ4153     | GCCTTACCATGGCTGTGGGCTG      |                   |
| C                    | SJ4154     | CCACTGACGGCGTCCAACCTC       | 134               |
|                      | SJ4155     | CTCTCCAGAAGAGCAGAGGCAAG     |                   |
| <i>B, BCL2 CHIP</i>  |            |                             |                   |
| Group                | Oligo name | Oligo sequence              | Product size (bp) |
| A                    | SJ4158     | ACCAGGAGGAGGAGAAAGGGTG      | 108               |
|                      | SJ4159     | CTAAAAAGGATGACTGCTACGAAGTTC |                   |
| B                    | SJ4160     | CGCGTCCTGCCTTCATTTATCCAG    | 169               |
|                      | SJ4161     | CAGGCATGAATCTCTATCCACGGG    |                   |

Table SVI. Oligonucleotide primers used for Chromosome conformation capture.

| ID                           | Oligo name | Oligo sequence           |
|------------------------------|------------|--------------------------|
| promoter, 1 <sup>st</sup>    | SJ4510     | ACACCAATCTGAGCAAATACTG   |
| promoter, 2 <sup>nd</sup>    | SJ4260     | GAGTGTTGTTATCTCTGGGTAG   |
| promoter, 1 <sup>st</sup>    | SJ4261     | TGCCCCAGAGTGAGCGGAAG     |
| promoter, 2 <sup>nd</sup>    | SJ4262     | CCGAATGACCGAAAGACAGGG    |
| promoter, 1 <sup>st</sup>    | SJ4263     | GTGGGCTCTGTGCCAGCC       |
| promoter, 2 <sup>nd</sup>    | SJ4264     | TCTCCCTCCCCAGCCAAG       |
| promoter, 1 <sup>st</sup>    | SJ4265     | CCAGTGCCTTGTGTGTGG       |
| promoter, 2 <sup>nd</sup>    | SJ4266     | TGGCGCCGCAGTCTCTGAAC     |
| 5'enhancer 1,1 <sup>st</sup> | SJ4267     | CGCGGGAAGTCGGGAAGG       |
| 5'enhancer 1,2 <sup>nd</sup> | SJ4268     | CTCGGTCTCGAGCCTCTTGG     |
| 5'enhancer 1,1 <sup>st</sup> | SJ4269     | CTCTGTCTCGCTCCCAAGGCTTTC |
| 5'enhancer 1,2 <sup>nd</sup> | SJ4270     | TGCAGCCCTCCGTGCTCCA      |
| 5'enhancer 2,1 <sup>st</sup> | SJ4271     | GGCCGGCCATTGTGTCTG       |
| 5'enhancer 2,2 <sup>nd</sup> | SJ4272     | CACCCTCCCTCCTTCTG        |
| 5'enhancer 2,1 <sup>st</sup> | SJ4273     | CGGCAGCTGAGGGACAGC       |
| 5'enhancer 2,2 <sup>nd</sup> | SJ4274     | CCAGGTGTCCAGCATGGC       |
| 5'enhancer 2,1 <sup>st</sup> | SJ4275     | CTCTTGCCAGAGCCGTG        |
| 5'enhancer 2,2 <sup>nd</sup> | SJ4276     | CCTGGAGTCCTACCCACTCTC    |
| 3'enhancer, 1 <sup>st</sup>  | SJ4277     | GAGGCAGGCGGACCACTTG      |
| 3'enhancer, 2 <sup>nd</sup>  | SJ4278     | GACCAGCCTGGCCAACATGATG   |
| 3' control                   | SJ4279     | GTTACCGTGCCCTGTCTG       |
| 3' control                   | SJ4280     | ATGGGCCTGGCCTAGACTTC     |
| 5' control                   | SJ4281     | CTATAAAGAAACGCCTGACAG    |

Table SVII. Oligonucleotide primers used for *ISG15 DNA methylation*.

| Oligo name |        | Oligo sequence                 | Product size (bp) |
|------------|--------|--------------------------------|-------------------|
| CpG1       | SJ4193 | TTAGTGTTTTGTGTGTGGTGGGTT       | 255               |
|            | SJ4194 | CCCTAACTAACAAAAAAAAACCCTATCCTA |                   |
| CpG2       | SJ4195 | TAGGGTTTTTTTTGTTAGTTAGGGTT     | 378               |
|            | SJ4196 | ACCTTATTCCRACCCTTAATCCTA       |                   |
